# Supplementary material for: Formation of Cyclobutane Pyrimidine Dimers after UVA Exposure (Dark-CPDs) Is Inhibited by an Hydrophilic Extract of Polypodium leucotomos
Source: MDPI journal article supplement (doi:10.3390/antiox10121961), 2021-12-07
Supplement: s1 [file s1]

## Supplementary Material

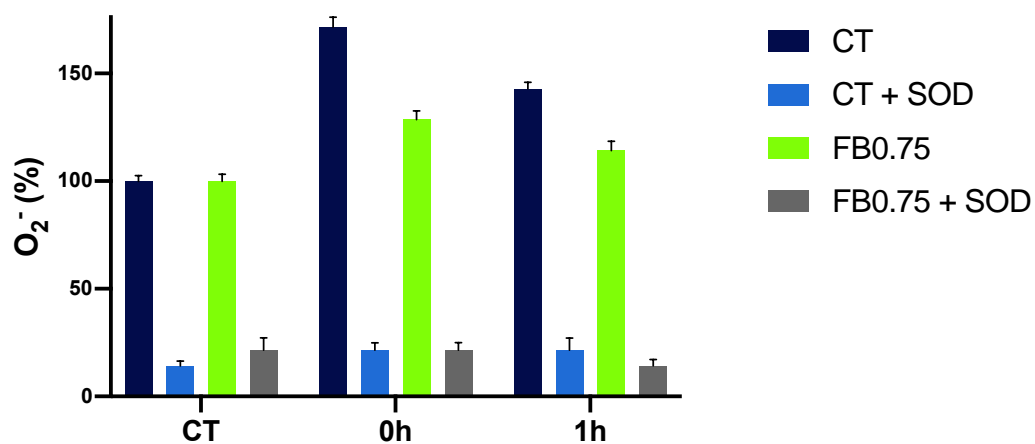

**Supplementary Figure S1.** Superoxide dismutase (SOD) inhibitable Nitro Blue Tetrazolium (NBT) reduction assay. Superoxide formation in melanocytes exposed to UVA radiation and the effect of the pre-treatment with FB, evaluated using the NBT and 5-methyl phenazinium methyl sulphate method. Cells were incubated with FB 0.75 mg/mL for 24 h and exposed to 470 mJ/cm<sup>2</sup> of UVA radiation. Samples were incubated with or without SOD (40U) for 10 minutes at 30 °C before quantification. Data were represented as percentages (%), taking the non-irradiated, non-treated control as reference (100%).
